# Supplementary material
Source: Springer Nature journal article supplement (https://www.springermedizin.de/resource/supplementary/13023_2009_193_MOESM16_ESM.pdf/9641832)

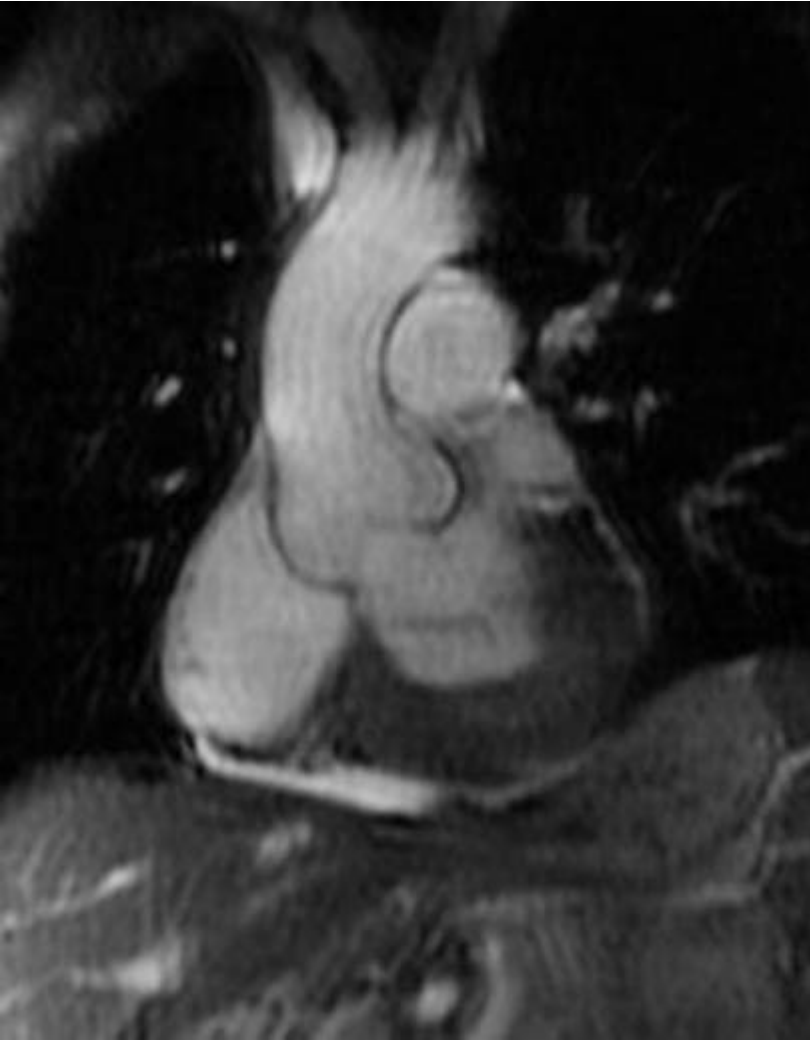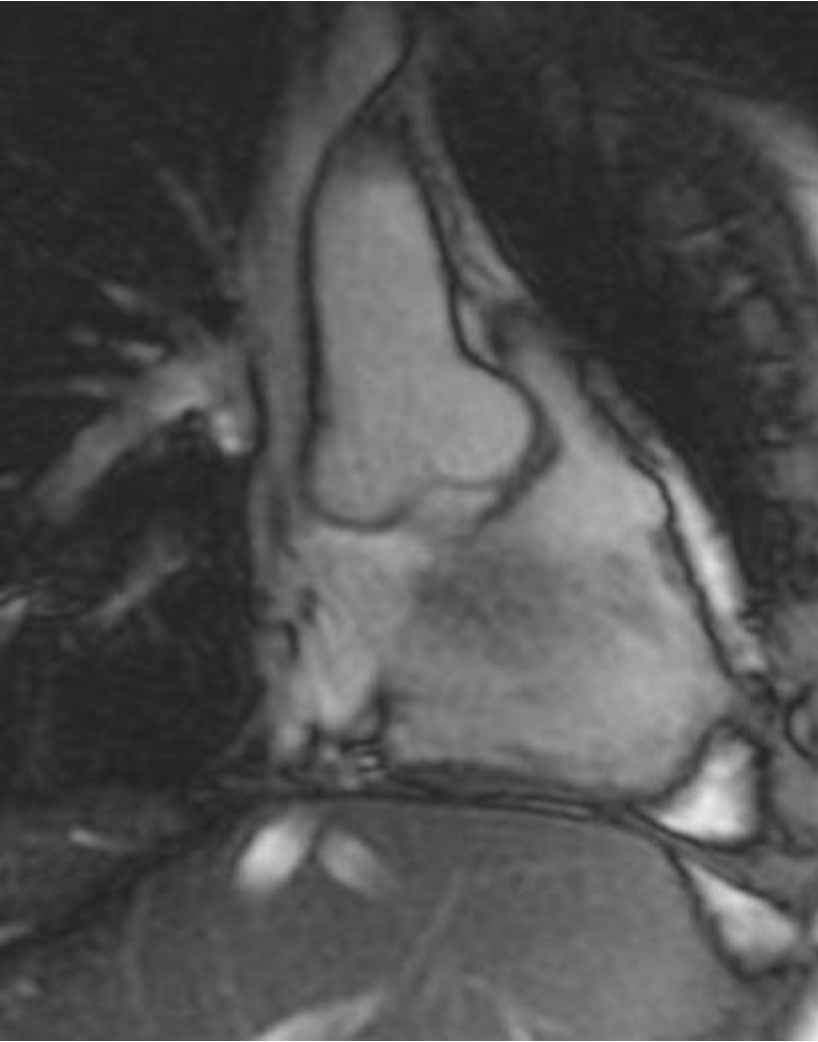

Supplement: MOESM16 [file 9641832]
